# Supplementary material for: Walking Speed is the Sole Determinant Criterion of Sarcopenia of Mild Cognitive Impairment in Japanese Elderly Patients with Type 2 Diabetes Mellitus
Source: MDPI journal article supplement (doi:10.3390/jcm9072133), 2020-07-06
Supplement: s1 [file s1]

**Supplement 2. Baseline characteristics of subgroups of studied patients with type 2 diabetes mellitus**

|                                          | Age < 60 years<br>n = 109 | Age ≥ 60 years<br>n = 329 | P     | Men<br>n = 244    | Women<br>n = 194   | P     | BMI < 25<br>n = 172 | BMI ≥ 25<br>n = 266 | P     |
|------------------------------------------|---------------------------|---------------------------|-------|-------------------|--------------------|-------|---------------------|---------------------|-------|
| Age, years                               | 51 [45, 55]               | 71 [67, 76]               | <0.01 | 69 [62, 75]       | 66 [58, 73]        | <0.05 | 71 [66, 77]         | 65 [54, 71]         | <0.01 |
| Male, n (%)                              | 78 (48)                   | 166 (60)                  | <0.05 |                   |                    |       | 106 (62)            | 138 (52)            | <0.05 |
| MOCA-J, points                           | 27 [26, 29]               | 25 [22, 27]               | <0.01 | 26 [23, 28]       | 26 [23, 27]        | 0.82  | 25 [23, 27]         | 26 [23, 28]         | 0.07  |
| MOCA-J < 26 points, n (%)                | 24 (22)                   | 193 (58)                  | <0.01 | 122 (50)          | 95 (49)            | 0.67  | 94 (55)             | 123 (46)            | <0.01 |
| <b>Anthropometry</b>                     |                           |                           |       |                   |                    |       |                     |                     |       |
| Systolic blood pressure, mmHg            | 128 [116, 138]            | 134 [122, 145]            | <0.01 | 131 [119, 142]    | 134 [122, 146]     | <0.05 | 129 [120, 143]      | 134 [121, 144]      | 0.17  |
| Diastolic blood pressure, mmHg           | 77 ± 11                   | 71 ± 11                   | <0.01 | 74 ± 12           | 73 ± 12            | 0.15  | 72 ± 11             | 75 ± 12             | <0.01 |
| Body weight, kg                          | 79.8 [67.5, 92.3]         | 61.2 [54.5, 71.9]         | <0.01 | 67.3 [59.0, 79.5] | 61.9 [51.0, 74.8]  | <0.01 | 56.0 [49.5, 60.0]   | 74.5 [65.9, 84.9]   | <0.01 |
| BMI, kg/m <sup>2</sup>                   | 29.8 [26.7, 34.7]         | 24.5 [21.8, 27.7]         | <0.01 | 24.7 [22.0, 28.1] | 26.6 [22.7, 31.2]  | <0.01 | 21.7 [20.4, 23.0]   | 28.3 [25.8, 32.1]   | <0.01 |
| Waist circumference, cm                  | 100.5 [89.9, 111.8]       | 88.0 [80.3, 97.0]         | <0.01 | 89.9 [82.0, 99.5] | 91.2 [82.0, 102.1] | 0.3   | 80.1 [76.3, 85.0]   | 98.0 [91.1, 105.1]  | <0.01 |
| Fat mass, kg                             | 29.7 [21.8, 39.9]         | 18.6 [13.6, 25.5]         | <0.01 | 18.9 [13.3, 25.6] | 23.3 [16.1, 32.4]  | <0.01 | 13.4 [10.5, 15.6]   | 27.1 [21.5, 33.8]   | <0.01 |
| Fat ratio, %                             | 37.6 [29.0, 45.5]         | 31.0 [24.0, 37.1]         | <0.01 | 27.9 [22.1, 34.1] | 38.1 [32.2, 45.4]  | <0.01 | 23.5 [18.8, 29.3]   | 37.2 [31.8, 43.7]   | <0.01 |
| Hand grip strength, kg                   | 37.0 [28.5, 47.5]         | 30.0 [23.0, 40.0]         | <0.01 | 40.0 [33.0, 46.0] | 25.0 [20.0, 29.0]  | <0.01 | 31.0 [23.3, 40.0]   | 33.0 [25.0, 42.0]   | <0.05 |
| Walking speed, m/sec                     | 1.67 [1.43, 1.82]         | 1.54 [1.33, 1.67]         | <0.01 | 1.67 [1.43, 1.82] | 1.54 [1.33, 1.67]  | <0.01 | 1.54 [1.36, 1.82]   | 1.54 [1.43, 1.82]   | 0.73  |
| Muscle mass, kg                          | 48.8 [41.2, 52.9]         | 41.5 [34.9, 46.7]         | <0.01 | 47.1 [42.9, 51.0] | 35.9 [32.5, 40.2]  | <0.01 | 39.3 [34.2, 44.7]   | 45.0 [37.8, 50.6]   | <0.01 |
| Skeletal muscle index, kg/m <sup>2</sup> | 7.8 [7.0, 8.7]            | 6.9 [6.2, 7.6]            | <0.01 | 7.6 [7.0, 8.3]    | 6.4 [5.8, 7.1]     | <0.01 | 6.6 [5.9, 7.2]      | 7.6 [6.8, 8.3]      | <0.01 |
| Sarcopenia, n (%)                        | 2 (1)                     | 36 (13)                   | <0.01 | 16 (7)            | 22 (11)            | <0.05 | 19 (11)             | 19 (7)              | <0.05 |
| <b>Comorbidities</b>                     |                           |                           |       |                   |                    |       |                     |                     |       |
| Duration of diabetes, years              | 11 [6, 15]                | 16 [10, 22]               | <0.01 | 15 [9, 22]        | 13 [8, 19]         | <0.05 | 15 [8, 23]          | 14 [9, 20]          | 0.25  |
| Hypertension, n (%)                      | 105 (65)                  | 199 (72)                  | 0.11  | 169 (69)          | 139 (70)           | 0.94  | 106 (62)            | 198 (74)            | <0.01 |
| Dyslipidemia, n (%)                      | 118 (73)                  | 184 (67)                  | 0.20  | 161 (66)          | 141 (73)           | 0.15  | 101 (59)            | 201 (76)            | <0.01 |
| Coronary heart diseases, n (%)           | 18 (11)                   | 46 (17)                   | 0.11  | 48 (20)           | 16 (8)             | <0.01 | 23 (13)             | 41 (15)             | 0.56  |
| Stroke, n (%)                            | 14 (9)                    | 22 (8)                    | 0.81  | 23 (9)            | 13 (7)             | 0.3   | 14 (8)              | 22 (8)              | 0.96  |
| <b>Life habits</b>                       |                           |                           |       |                   |                    |       |                     |                     |       |
| Regular walking, n (%)                   | 57 (35)                   | 116 (56)                  | 0.17  | 101 (41)          | 72 (37)            | 0.39  | 74 (43)             | 99 (37)             | 0.21  |
| Current or ex-smoker, n (%)              | 93 (57)                   | 138 (50)                  | 0.89  | 183 (75)          | 48 (25)            | <0.01 | 95 (55)             | 136 (51)            | 0.1   |
| Current or ex-drinker, n (%)             | 61 (38)                   | 134 (49)                  | <0.05 | 156 (64)          | 39 (20)            | <0.01 | 86 (50)             | 109 (41)            | <0.01 |
| <b>Blood measurements</b>                |                           |                           |       |                   |                    |       |                     |                     |       |
| Albumin, g/dL                            | 4.4 [4.1, 4.6]            | 4.2 [4.0, 4.4]            | <0.01 | 4.3 [4.1, 4.5]    | 4.2 [4.0, 4.4]     | 0.18  | 4.3 [4.0, 4.5]      | 4.2 [4.0, 4.4]      | 0.65  |
| AST, U/L                                 | 22 [17, 32]               | 21 [17, 27]               | 0.47  | 22 [18, 29]       | 20 [17, 26]        | <0.05 | 20 [17, 26]         | 22 [17, 30]         | 0.05  |
| ALT, U/L                                 | 24 [17, 46]               | 18 [13, 26]               | <0.01 | 20 [14, 31]       | 18 [13, 27]        | <0.05 | 17 [12, 22]         | 21 [15, 35]         | <0.01 |
| γGP, U/L                                 | 31 [19, 57]               | 23 [17, 35]               | <0.01 | 27 [19, 45]       | 22 [15, 34]        | <0.01 | 21 [15, 32]         | 27 [18, 44]         | <0.01 |
| Fasting plasma Glucose, mg/dL            | 131 [115, 158]            | 132 [119, 151]            | 0.79  | 138 [122, 157]    | 129 [113, 145]     | <0.01 | 132 [117, 148]      | 133 [118, 156]      | 0.12  |
| Glycated hemoglobin, %                   | 7.1 [6.4, 8.1]            | 6.8 [6.4, 7.4]            | <0.01 | 7.0 [6.5, 7.6]    | 6.8 [6.4, 7.3]     | 0.06  | 6.8 [6.4, 7.4]      | 7.0 [6.5, 7.5]      | 0.23  |
| LDLcholesterol, mg/dL                    | 108 [90, 126]             | 99 [81, 117]              | <0.01 | 97 [79, 115]      | 105 [87, 124]      | <0.01 | 101 [81, 118]       | 101 [83, 118]       | 0.51  |
| HDL cholesterol, mg/dL                   | 51 [45, 60]               | 54 [46, 65]               | <0.05 | 51 [44, 61]       | 58 [49, 67]        | <0.01 | 56 [46, 68]         | 53 [46, 61]         | <0.01 |
| Triglycerides, mg/dL                     | 129 [91, 186]             | 95 [70, 141]              | <0.01 | 105 [72, 156]     | 102 [73, 145]      | 0.61  | 86 [61, 130]        | 113 [85, 167]       | <0.01 |
| Creatinine, mg/dl                        | 0.78 [0.65, 0.90]         | 0.86 [0.71, 1.02]         | <0.01 | 0.92 [0.79, 1.09] | 0.69 [0.59, 0.82]  | <0.01 | 0.84 [0.69, 1.01]   | 0.81 [0.68, 0.98]   | 0.42  |
| eGFR, ml/min/1.73m <sup>2</sup>          | 71.7 ± 19.9               | 60.0 ± 16.3               | <0.01 | 64.0 ± 18.1       | 64.7 ± 19.1        | 0.70  | 63.1 ± 18.2         | 65.0 ± 18.8         | 0.29  |
| <b>Medications</b>                       |                           |                           |       |                   |                    |       |                     |                     |       |
| Sulfonylurea, n (%)                      | 15 (9)                    | 28 (10)                   | 0.76  | 28 (12)           | 15 (8)             | 0.19  | 14 (8)              | 29 (11)             | 0.34  |
| Insulin, n (%)                           | 46 (28)                   | 79 (29)                   | 0.96  | 73 (30)           | 52 (27)            | 0.47  | 56 (33)             | 69 (26)             | 0.14  |
| Biguanide, n (%)                         | 101 (62)                  | 123 (45)                  | <0.01 | 119 (49)          | 105 (54)           | 0.27  | 72 (42)             | 152 (57)            | <0.01 |
| Glinide, n (%)                           | 30 (19)                   | 83 (30)                   | <0.01 | 74 (30)           | 39 (20)            | <0.05 | 57 (33)             | 56 (21)             | <0.01 |
| Pioglitazone, n (%)                      | 61 (38)                   | 77 (28)                   | <0.05 | 76 (31)           | 62 (32)            | 0.86  | 24 (14)             | 114 (43)            | <0.01 |
| α-GI, n (%)                              | 26 (16)                   | 61 (22)                   | 0.13  | 61 (25)           | 26 (13)            | <0.01 | 45 (26)             | 42 (16)             | <0.01 |
| DPP4 inhibitor, n (%)                    | 92 (57)                   | 179 (65)                  | 0.94  | 153 (63)          | 118 (61)           | 0.69  | 106 (62)            | 165 (62)            | 0.93  |
| GLP1, n (%)                              | 21 (13)                   | 12 (4)                    | <0.01 | 26 (11)           | 7 (4)              | <0.01 | 9 (5)               | 24 (9)              | 0.15  |
| SGLT2 inhibitor, n (%)                   | 47 (29)                   | 48 (17)                   | <0.01 | 58 (24)           | 37 (19)            | 0.24  | 26 (15)             | 69 (26)             | <0.01 |

Median [25%, 75%], Mean ± SD or number (%)
